# Supplementary material for: Orientation control (horizontal and vertical) of TiO2 single-crystalline nanowire arrays for high-performance gas sensing: a surface supersaturation-driven approach
Source: Royal Society of Chemistry journal article supplement (doi:10.1039/d5ta00573f), 2025-01-01
Supplement: d5ta00573f1.pdf [file d5ta00573f1.pdf]

## Supporting Information

### **Orientation Control (Horizontal and Vertical) of TiO<sub>2</sub> Single-Crystalline Nanowire Arrays for High-performance Gas Sensing: A Surface Supersaturation-driven Approach**

*Chen-Hu Shen,<sup>a,d</sup> Wen-Jing Jiang,<sup>c</sup> Yong-Jun Chen,<sup>a</sup> Guan-E Wang,<sup>a,b</sup> Gang Xu<sup>a,b,\*</sup> and Xiao-Liang Ye<sup>a,\*</sup>*

<sup>a</sup>State Key Laboratory of Structural Chemistry, Fujian Institute of Research on the Structure of Matter, Chinese Academy of Sciences (CAS), 350002, Fuzhou City, Fujian, China.

<sup>b</sup>Fujian College, University of Chinese Academy of Sciences, 350002, Fuzhou City, Fujian, China.

<sup>c</sup>Fujian Science & Technology Innovation Laboratory for Optoelectronic Information of China, 350108, Fuzhou City, Fujian, P. R. China.

<sup>d</sup>University of Chinese Academy of Science (UCAS), Beijing 100049, China.

\* Corresponding author.

E-mail: [gxu@fjirsm.ac.cn](mailto:gxu@fjirsm.ac.cn); [yexl@fjirsm.ac.cn](mailto:yexl@fjirsm.ac.cn)

## Table of Contents

|                                                 |    |
|-------------------------------------------------|----|
| Chemicals.....                                  | 3  |
| Preparation of TiO <sub>2</sub> Nanowires ..... | 3  |
| Characterization .....                          | 4  |
| Gas Sensing Measurement .....                   | 4  |
| Raman Spectra Analysis .....                    | 6  |
| Sensing Mechanism .....                         | 6  |
| Figure S1.....                                  | 8  |
| Figure S2.....                                  | 9  |
| Figure S3.....                                  | 10 |
| Figure S4.....                                  | 11 |
| Figure S5.....                                  | 12 |
| Figure S6.....                                  | 13 |
| Figure S7.....                                  | 14 |
| Figure S8.....                                  | 15 |
| Figure S9.....                                  | 16 |
| Table S1 .....                                  | 17 |
| Notes and References.....                       | 19 |

## Chemicals

All solvents and reagents obtained from commercial sources were used without further purification. Tetrabutyl titanate (TBT, > 98%) was purchased from General-Reagent. Ethanol (EtOH, AR), sodium chloride (NaCl, AR), hydrochloric acid (HCl, 36 ~ 38%) and N,N-dimethylformamide (DMF, AR) was purchased from Sinopharm Chemical Reagent Co., Ltd. The substrates used to grow nanowire arrays are sapphire substrates ( $8 \times 10 \times 0.6 \text{ mm}^3$ ) was purchased from Oufeng Optics, China. All aqueous solutions were prepared with Milli-Q water (18.2 M $\Omega$ ). Ag paste (SA-5121Q) was purchased from Wuhan Youle Optoelectronics Technology Co., Ltd., China, which was used to build the ohmic contact to test the gas sensor.

## Preparation of TiO<sub>2</sub> Nanowires

The sapphire substrates were ultrasonically washed with DMF, H<sub>2</sub>O and EtOH for 5 min, respectively. The coating colloid solution with ethanol solution of tetrabutyl titanate (TBT) (0.04 M) was coated onto the cleaned sapphire substrate using spin coater at the rate of 3000 rpm for 5 s. They were annealed at 400 °C for 30 min to form a layer of TiO<sub>2</sub> seed. Then, the seeded substrate was up-down immersed in 5 mL solution containing de-ionized water, hydrochloric acid, saturated salt water and tetrabutyl titanate (volume ratio of 30 : 15 : 10 : 1) in a Teflon-lined stainless steel autoclave. The autoclave was sealed and maintained at 120 °C for 4 hours. After that, the substrate was washed repeatedly with deionized water and ethanol each for 3 times. Finally, the TiO<sub>2</sub> was obtained after heating at 400 °C for 30 min. By adjusting the concentration of the crystal seed concentration, TiO<sub>2</sub> NAs with different morphology were achieved. Samples with crystal seed precursor concentration of 0.02, 0.03, 0.04, 0.05 and 0.06 M were labeled **A1**, **A2**, **A3**, **A4** and **A5**, respectively. Sample **A3** was labeled as **TiO<sub>2</sub>-H-NAs**, **A5** was labeled as **TiO<sub>2</sub>-V-NAs**.

## Characterization

Powder X-Ray diffraction (PXRD) patterns of samples were carried out on a Rigaku SmartLab (Japan) equipped with Cu K $\alpha$  radiation ( $\lambda = 1.54060 \text{ \AA}$ ). The scanning electron microscopy (ZEISS Sigma 500) and transmission electron microscope (TEM, JEOL F200) were applied to investigate the morphology of the samples. Raman spectra were obtained on LabRAM HR. The data of XPS were collected on a Thermo Scientific ESCALAB 250 Xi XPS system (monochromatic Al K $\alpha$  X-rays (1486.6 eV) operating at 15 kV; base pressure:  $5.0 \times 10^{-8} \text{ Pa}$ ). Photoluminescence spectra was performed on a Hitachi F-7100 spectrofluorimeter. A xenon arc lamp (CEL-HXF300/CELHXUV300) with a light filter (200-1000 nm) was utilized as an irradiation source. *In situ* near ambient pressure X-ray photoelectron spectroscopy (NAP-XPS) experiment was carried out with the Proven-X NAP system (Germany, SPECS). The sample of **TiO<sub>2</sub>-H-NAs** was exposed to dry air at 5 mbar irradiating by the Xe lamp, and then a gas mixture of 1000 ppm EtOH in air at 5 mbar total pressure irradiating by the Xe lamp.

## Gas Sensing Measurement

**TiO<sub>2</sub>-H-NAs** and **TiO<sub>2</sub>-V-NAs** were grown on sapphire substrate, which were connected to both ends by a pair of parallel electrodes (silver paste) to fabricate the gas sensor.

The sensor characterization was conducted by a home-made system reported in our previous work.<sup>[1]</sup> The target gas was introduced into the quartz tube by mixing the certified gas “mixtures” (Beijing Hua Yuan Gas Chemical Industry Co., Ltd., China) and dry air in a proper ratio controlled by the mass flow controllers (CS-200C, Beijing Sevenstar Qualiflow Electronic Equipment Manufacturing Co., Ltd., China) under light irradiation ( $\lambda = 200 - 1000 \text{ nm}$ ) and room temperature. The constant flow was  $600 \text{ mL min}^{-1}$ , the bias on the sensor was 5 V and the current was recorded using Keithley 2602B Sourcemeeter.

The sensor response with positive response in this work is defined as the ratio of sensor resistance in air ( $R_{\text{air}}$ ) and in analytic gas ( $R_{\text{analyte}}$ ):

$$\text{Response} = R_{\text{air}}/R_{\text{analyte}} - 1$$

The sensor response with negative response in this work in this work is defined as the ratio of  $R_{\text{air}}$  and  $R_{\text{analyte}}$ :

$$\text{Response} = R_{\text{analyte}}/R_{\text{air}} - 1$$

The response time ( $t_{\text{res.}}$ ) of the sensor with positive response is the time required the increasing current to 90% of the saturation value and the recovery time ( $t_{\text{rec.}}$ ) is the time required decreasing the saturated current to its 10%. The  $t_{\text{res.}}$  and  $t_{\text{rec.}}$  of the sensor with negative response is contrary based on the positive response.

The coefficient of variation (CV) is used to represent the change of different cycle on responses, which is defined as:

$$\text{CV} = R_{\text{SD}}/R_{\text{average}} \times 100\%$$

$R_{\text{SD}}$  and  $R_{\text{average}}$  are the standard deviation (SD) and average value of responses with different cycle, respectively.

In order to simulate the ethanol breath test, the dry air was purged into the chamber for stabilizing the base current line. Meanwhile, a mixture of ethanol, carbon dioxide and air with a certain humidity are passed into the gas mixing tank for 15 minutes (See details in the Supporting Video). Subsequently, the mixed gases are purged into the chamber for the sensing test. After a designed response time, the device in the chamber was purged using dry air. In the whole test, the current change of the device in the chamber was monitored by the source meter, which would display on the computer screen.

## Raman Spectra Analysis

Rutile  $\text{TiO}_2$  was tetragonal and belonged to the space group  $P42/mnm$  with two  $\text{TiO}_2$  molecules per unit cell.<sup>[2]</sup> In general, the first-order Raman spectra of rutile  $\text{TiO}_2$  exhibits four Fourier Transform (FT) Raman-active fundamental modes corresponding to  $B_{1g}$  ( $143 \text{ cm}^{-1}$ ),  $E_g$  ( $447 \text{ cm}^{-1}$ ),  $A_{1g}$  ( $612 \text{ cm}^{-1}$ ) and  $B_{2g}$  ( $826 \text{ cm}^{-1}$ ).<sup>[3]</sup> Besides, it also contained a second-order scattering (\*) at  $237 \text{ cm}^{-1}$ .<sup>[4]</sup>  $E_g$  and  $A_{1g}$  were considered as characteristic peaks of rutile  $\text{TiO}_2$ . The peak of  $E_g$  was nonpolar mode, representing the vibration mode of the Ti-O stretch, while  $A_{1g}$  was polar modes, indicating the vibration mode of released oxygen atoms from the phase along the c-axis. Raman spectra of  $\text{TiO}_2$  was recorded at 532 nm laser at room temperature (Figure S3). Both of them showed four bands,  $135 \text{ cm}^{-1}$  ( $B_{1g}$ ) ( $B_{1g}$  was relatively small and absent, which related to vibration mode of O-Ti-O bond bending),  $258 \text{ cm}^{-1}$  (\*),  $440 \text{ cm}^{-1}$  ( $E_g$ ), and  $604 \text{ cm}^{-1}$  ( $A_{1g}$ ) for **TiO<sub>2</sub>-H-NAs**,  $143 \text{ cm}^{-1}$  ( $B_{1g}$ ),  $236 \text{ cm}^{-1}$  (\*),  $445 \text{ cm}^{-1}$  ( $E_g$ ), and  $608 \text{ cm}^{-1}$  ( $A_{1g}$ ) for **TiO<sub>2</sub>-V-NAs**. **TiO<sub>2</sub>-H-NAs** exhibit a slight redshift in the peak position ( $E_g$  and  $A_{1g}$ ) and a slight broadening in linewidth as compared with the **TiO<sub>2</sub>-V-NAs** ( $E_g$ , full width at half maximum (FWHM)  $\sim 41 \text{ cm}^{-1}$ ;  $A_{1g}$ , FWHM  $\sim 36 \text{ cm}^{-1}$ ), which was likely to be related to a phonon confinement effect and oxygen vacancy defects in rutile  $\text{TiO}_2$  structures.<sup>[5,6]</sup> And the intensity of the Raman peaks related to the concentration or number of molecules. It could be seen from the Figure S3 that the peaks intensity of **TiO<sub>2</sub>-H-NAs** was obviously weaker than that **TiO<sub>2</sub>-V-NAs**, indicating that **TiO<sub>2</sub>-H-NAs** had a smaller thickness, consistent with the results of Cross-sectional (Figure S1).

## Sensing Mechanism

First, when **TiO<sub>2</sub>-H-NAs** was exposed to dry air, oxygen molecules were adsorbed on the surface of nanowires and eventually converted to  $\text{O}_2^-(\text{ads})$  ions by obtaining free electrons from the surface of the nanowires. When the electrons on the surface of the nanowires were consumed, a depletion region was formed near surface of nanowires, resulting in a decrease in the thickness of the conducting channel.

Therefore, the resistance of **TiO<sub>2</sub>-H-NAs** in the air environment was very high. When exposed to reducing volatile organic compounds such as ethanol, oxygen ions adsorbed on the surface of nanowires reacted with ethanol, which results to the released of electrons, increased carriers concentration, lowered the width of surface depletion region, increased thickness of conducting channel, and reduced resistance of **TiO<sub>2</sub>-H-NAs**.

### **Demo Experiment**

Please find attached videos from BaiduNest Link:

<https://pan.baidu.com/s/1X6w7OPg01zBrq35Y4EKR7Q> password: tcis

Figure S1

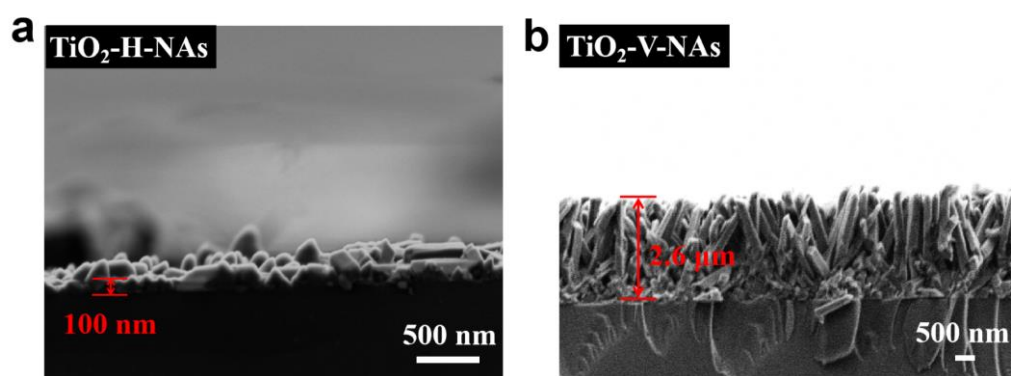

**Figure S1** Cross-sectional SEM images of (a) **TiO<sub>2</sub>-H-NAs** and (b) **TiO<sub>2</sub>-V-NAs**.



**Figure S2**

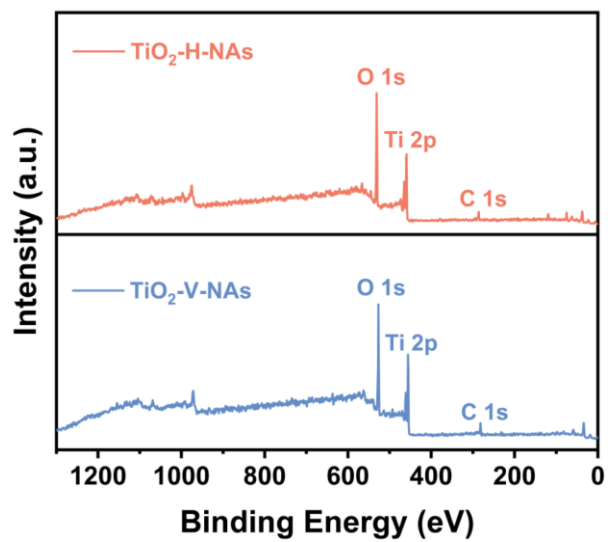

**Figure S2** XPS survey spectrum of the  $\text{TiO}_2\text{-H-NAs}$  and  $\text{TiO}_2\text{-V-NAs}$ .

**Figure S3**

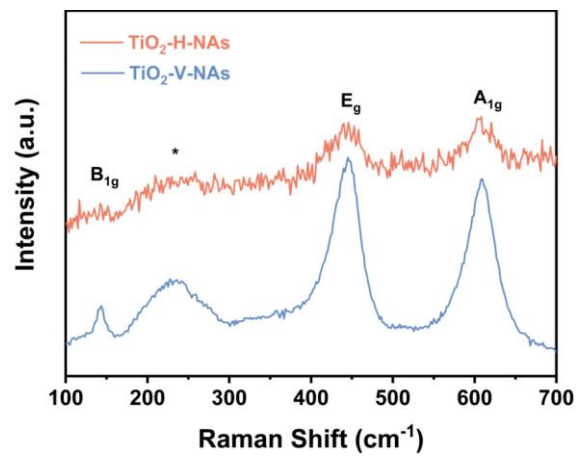

**Figure S3** Raman spectra of the TiO<sub>2</sub>-H-NAs and TiO<sub>2</sub>-V-NAs.

**Figure S4**

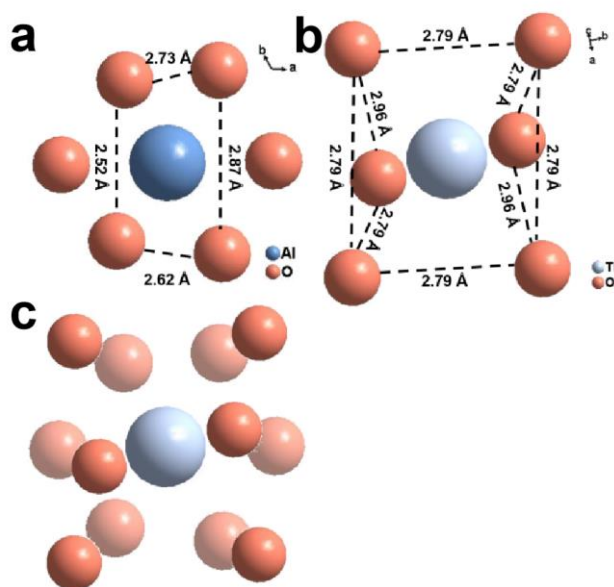

**Figure S4** Schematic plots of the lattice relationships between sapphire substrate and  $\text{TiO}_2\text{-V-NAs}$ . (a) Sapphire substrate (006), (b)  $\text{TiO}_2\text{-V-NAs}$  (101) and (c)  $\text{TiO}_2\text{-V-NAs}$  (101) on sapphire substrate (006).

Figure S5

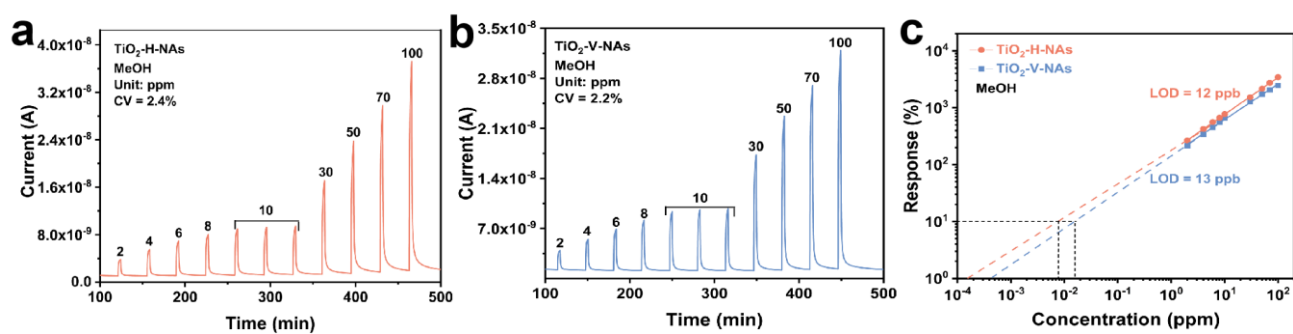

Figure S5 Response-recovery curve to methanol with different concentrations (2-100 ppm) of (a) TiO<sub>2</sub>-H-NAs and (b) TiO<sub>2</sub>-V-NAs. (c) Log-log linear fitting of the response-concentration plot for methanol.

**Figure S6**

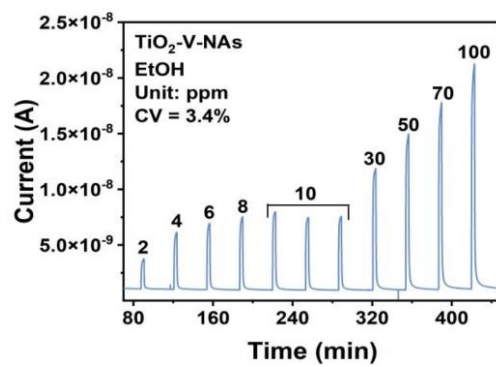

**Figure S6** Response-recovery curve to ethanol with different concentrations (2-100 ppm) of  $\text{TiO}_2\text{-V-NAs}$ .

**Figure S7**

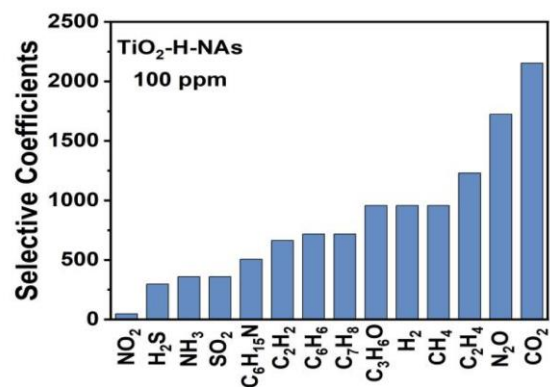

**Figure S7** Selectivity coefficients of **TiO<sub>2</sub>-H-NAs** to various 100 ppm gases.

Figure S8

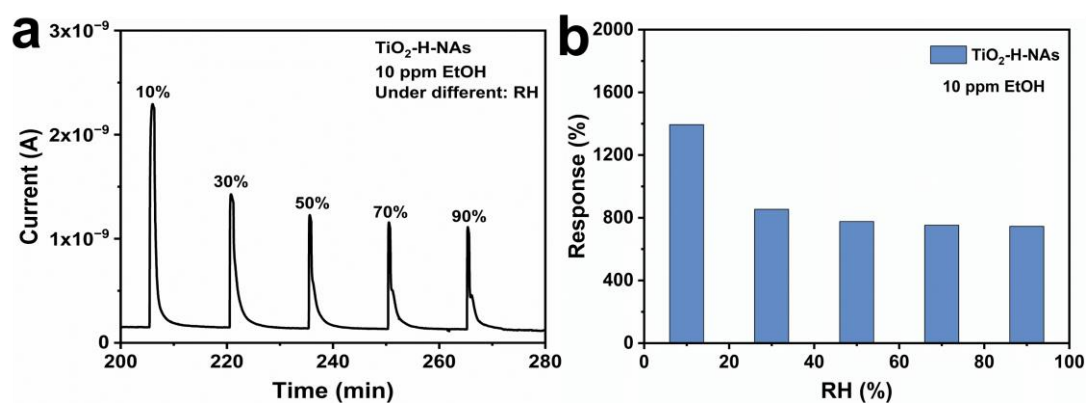

**Figure S8** (a) Response-recovery curve of **TiO<sub>2</sub>-H-NAs** sensor to 10 ppm EtOH under different humidity condition (10, 30, 50, 70 and 90% RH). (b) Response values of **TiO<sub>2</sub>-H-NAs** to 10 ppm EtOH under various RH.

**Figure S9**

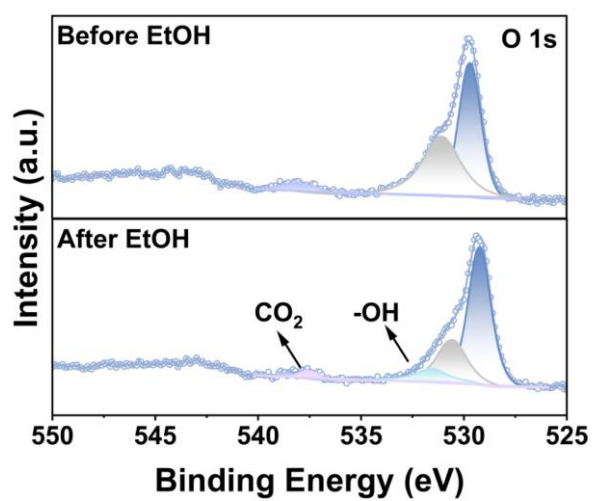

**Figure S9** *In situ* NAP-XPS spectra for  $\text{TiO}_2\text{-H-NAs}$  of O 1s before (at 5 mbar air) and after (at 5 mbar gas mixture of 1000 ppm EtOH in air) exposure to ethanol.



**Table S1**

Sensing performance of various chemiresistor gas sensors for ethanol.

| No. | Materials                                                                                        | LOD (ppm) | Response Time (s) | Recovery Time (s) | Detection Concentration (ppm) | Ref. |
|-----|--------------------------------------------------------------------------------------------------|-----------|-------------------|-------------------|-------------------------------|------|
| 1   | WS <sub>2</sub> /WO <sub>3</sub>                                                                 | 0.001     | 54                | 26                | 10                            | 7    |
| 2   | TiO <sub>2</sub> /TiC                                                                            | 0.01      | 2                 | 2.2               | 10                            | 8    |
| 3   | ZnO oxygen vacant                                                                                | 0.01      | 300               | 360               | 1                             | 9    |
| 4   | ZnO                                                                                              | 0.01      | 660               | 720               | 1                             | 9    |
| 5   | ZnO/GaN                                                                                          | 0.10      | 12                | 9                 | 50                            | 10   |
| 6   | ZIF-8& Ag@SiNWs                                                                                  | 0.125     | 5.5               | 45                | 3400                          | 11   |
| 7   | SnS                                                                                              | 0.5       | 2                 | 3                 | 0.5                           | 12   |
| 8   | Cubic/orthorhombic SnS                                                                           | 0.5       | 6                 | 9                 | 10                            | 13   |
| 9   | Ti <sub>3</sub> C <sub>2</sub> T <sub>x</sub> /WS <sub>2</sub>                                   | 1         | 9.7               | 6.6               | 40                            | 14   |
| 10  | NiO/SnO <sub>2</sub>                                                                             | 1         | 23                | 13                | 100                           | 15   |
| 11  | TiO <sub>2</sub>                                                                                 | 1         | 30                | 16                | 100                           | 16   |
| 12  | g-C <sub>3</sub> N <sub>4</sub> /GNPs                                                            | 1         | --                | --                | 10                            | 17   |
| 13  | g-C <sub>3</sub> N <sub>4</sub> /Ag <sub>2</sub> ZrO <sub>3</sub>                                | 1         | --                | --                | 50                            | 18   |
| 14  | MoS <sub>2</sub> /CeO <sub>2</sub>                                                               | 1         | 7                 | 5                 | 30                            | 19   |
| 15  | Ag-doped SnS                                                                                     | 1         | 19                | 36                | 10                            | 20   |
| 16  | Ag-functionalized SnS                                                                            | 1         | 16                | 53                | 10                            | 20   |
| 17  | MoO <sub>2</sub> /MoO <sub>3</sub> /Ti <sub>3</sub> C <sub>2</sub> T <sub>x</sub>                | 5         | 46                | 276               | 5                             | 21   |
| 18  | Graphene-based Ink                                                                               | 5         | 6                 | 36                | 30                            | 22   |
| 19  | TiO <sub>2</sub> -Ti <sub>3</sub> C <sub>2</sub> T <sub>x</sub> /g-C <sub>3</sub> N <sub>4</sub> | 10        | --                | --                | 10                            | 23   |
| 20  | TiO <sub>2</sub>                                                                                 | 10        | -                 | --                | 100                           | 24   |
| 21  | F-doped SnO <sub>2</sub>                                                                         | 10        | 85                | 145               | 100                           | 25   |
| 22  | APTES-WO <sub>3-x</sub>                                                                          | 10        | 168               | --                | 10                            | 26   |
| 23  | SiO <sub>2</sub> /GO                                                                             | 10        | --                | --                | 50                            | 27   |
| 24  | CNTs/Co <sub>3</sub> O <sub>4</sub> @rGO                                                         | 10        | --                | --                | 50                            | 28   |
| 25  | α-Fe <sub>2</sub> O <sub>3</sub> /PANI/PbS                                                       | 10        | --                | --                | 10                            | 29   |
| 26  | MoO <sub>2</sub> -Ni-graphene                                                                    | 15        | --                | --                | 1000                          | 30   |
| 27  | rGO                                                                                              | 25        | 2                 | 17                | 25                            | 31   |
| 28  | SnO <sub>2</sub> /rGO                                                                            | 29        | 123               | 128               | 145                           | 32   |
| 29  | PANI/N-doped GQDs                                                                                | 50        | 80                | 62                | 100                           | 33   |

|    |                                               |         |     |      |        |           |
|----|-----------------------------------------------|---------|-----|------|--------|-----------|
| 30 | ZnO                                           | 50      | 20  | 12   | 100    | 34        |
| 31 | Zn-Nitrogenated graphene                      | 50      | 102 | 550  | 1500   | 35        |
| 32 | PbS/SnS <sub>2</sub>                          | 60      | 104 | 84   | 60     | 36        |
| 33 | Au-functionalized PbS/SnS                     | 60      | 40  | 65   | 60     | 37        |
| 34 | Poly(o-phenylenediamine)                      | 87      | 480 | 1080 | 130    | 38        |
| 35 | AAO                                           | 100     | --  | --   | 100    | 39        |
| 36 | GONRs                                         | 100     | --  | --   | 100    | 40        |
| 37 | Ti <sub>3</sub> C <sub>2</sub> T <sub>x</sub> | 100     | --  | --   | 100    | 41        |
| 38 | CuO/C                                         | 170     | 105 | 18   | 10     | 42        |
| 39 | ZnO/NiO                                       | 250     | 2.7 | 3.6  | 250    | 43        |
| 40 | Ti <sub>3</sub> C <sub>2</sub> T <sub>x</sub> | 1000    | --  | --   | 1000   | 44        |
| 41 | α-Fe <sub>2</sub> O <sub>3</sub> /Ag          | 2 mg/L  | 17  | 33   | 35mg/L | 45        |
| 42 | ox-SWCNH/SnO <sub>2</sub> /PVP                | 2 mg/mL | 30  | 50   | --     | 46        |
| 43 | Ce-doped LaCoO <sub>3</sub>                   | 10%     | 16  | 8    | 0.3    | 47        |
| 44 | TiO <sub>2</sub> -V-NAs                       | 0.001   | 54  | 60   | 10     | This work |
| 45 | TiO <sub>2</sub> -H-NAs                       | 0.0006  | 90  | 78   | 10     | This work |

## Notes and References

- 1 M. S. Yao, W. X. Tang, G. E. Wang, B. Nath, G and Xu, G, *Adv. Mater.*, 2016, **28**, 5229-5234.
- 2 C. R. Aita, *Appl. Phys. Lett.*, 2007, **90**, 213112.
- 3 V. Swamy, B. C. Muddle and Q. Dai, *Appl. Phys. Lett.*, **2006**, 89, 163118.
- 4 S. P. S. Porto, P. A. Fleury, and T. C. Damen, *Phys. Rev. Lett.*, 1967, **154**, 522.
- 5 S. M. Oh and T. Ishigaki, *Thin Solid Films*, **2004**, **457**, 186-191.
- 6 V. Swamy, *Phys. Rev. B.*, 2008, **77**, 195414.
- 7 D. Zhang, Y. Cao, J. Wu and X. Zhang, *Appl. Surf. Sci.*, 2020, **503**, 144063.
- 8 A. V. Raghu, K. K. Karuppanan, J. Nampoothiri and B. Pullithadathil, *ACS Appl. Nano Mater.*, 2019, **2**, 1152-1163.
- 9 Z. Ul Abideen, J. G. Choi, J. A. Yuwono, A. Kiy, P. V. Kumar, K. Murugappan, W. J. Lee, P. Kluth, D. R. Nisbet, T. Tran-Phu, M. H. Yoon and A. Tricoli, *Adv. Electron. Mater.*, 2023, **9**, 2200905.
- 10 C. Wang, Z. G. Wang, R. Xi, L. Zhang, S. H. Zhang, L. J. Wang and G. Pan, *Sens. Actuators B Chem.*, 2019, **292**, 270-276.
- 11 Y. Qui, X. Wang and J. Zang, *Sens. Actuators B Chem.*, 2021, **340**, 129959.
- 12 Y. Qin, Y. Bai, J. Xie and H. Gui, *Vacuum*, 2023, **207**, 111616.
- 13 Y. Qin, Y. Liang, C. Zhou and Y. Bai, *Sens. Actuator B Chem.*, 2024, **404**, 135285.
- 14 W. Y. Chen, X. Jiang, S. N. Lai, D. Peroulis and L. Stanciu, *Nat Commun.*, 2020, **11**, 1302.
- 15 N. Jayababu, M. Poloju, J. Shruthi and M. V. R. Reddy, *Ceram. Int.*, 2019, **45**, 15134-15142.
- 16 B. Bhowmik, K. Dutta and P. Bhattacharyya, *IEEE Trans. Electron Devices.*, 2019, **66**, 1063-1068.
- 17 S. Sahani, S. J. Park, Y. Myung, T. H. Pham, T. T. Tung and T. Y. Kim, *ACS Omega*, 2022, **7**, 41905-41914.
- 18 S. P. S. David, S. Veeralakshmi, M. S. Priya, S. Nehru and S. Kalaiselvam, *J. Mater. Sci. Mater. Electron.*, 2022, **33**, 11498-11510.
- 19 J. Zhang, T. Li, J. Guo, Y. Hu and D. Zhang, *Appl. Surf. Sci.*, 2021, **568**, 150942.
- 20 Y. Qin and X. Wang, *Physica E low Dimens. Syst. Nanostruct.*, 2021, **131**, 114752.
- 21 S. Zhang, P. Song, Y. Zheng, Y. Ding and Q. Wang, *J. Alloys Compd.*, 2022, **925**, 166663.
- 22 K. Hassan, T. T. Tung, P. L. Yap, H. Rastin, N. Stanley, M. J. Nine and D. Losic, *ACS Sens.*, 2021, **6**, 3685-3695.
- 23 M. Hou, J. Gao, L. Yang, S. Guo, T. Hu and Y. Li, *App. Surf. Sci.*, 2021, **535**, 147666.
- 24 M. Wang, Y. Zhu, D. Meng, K. Wang and C. Wang, *Mater. Lett.*, 2020, **277**, 128372.
- 25 E. P. Nascimento, H. C. T. Firmino, A. M. C. Santos, H. B. Sales, V. D. Silva, D. A. Macedo, G. A. Neves and E. S. Medeiros, R. R. Menezes, *J. Am. Ceram. Soc.*, 2021, **104**, 1297-1308.
- 26 M. Tomic, Z. Fohlerova, I. Gracia, E. Figueras, C. Cane and S. Vallejos, *Sens. Actuators B Chem.*, 2021, **328**, 129046.
- 27 N. Kaur, M. Singh, A. Casotto, H. M. M. M. Arachchige and L. Sangaletti, E. Comini, *Appl. Phys. Rev.*, 2022, **9**, 041407.
- 28 M. Morsy, I. S. Yahia, H. Y. Zahran and M. Ibrahim, *J Inorg Organomet Polym Mater.*, 2018, **29**, 416-422.
- 29 Y. Zhang, W. Pan, G. Dong and D. A. Zhang, *J. Mater. Sci. Mater. Electron.*, 2019, **30**, 17907-17915.
- 30 S. Mehmood, X. Zhao, M. F. Bhopal, F. U. Khan, Y. Yang, G. Wang and X. Pan, *Appl. Surf. Sci.*, 2021, **554**, 149595.
- 31 P. Tiwary, S. G. Chatterjee, S. S. Singha, R. Mahapatra and A. K. Chakraborty, *FlatChem*, 2021, **30**, 100317.
- 32 N. Pienutsa, P. Roongruangsree, V. Seedokbuab, K. Yannawibut, C. Phatoomvijitwong and S. Srinives, *Nanotechnology*, 2020, **32**, 11.

- 33 C. M. Masemola, N. Moloto, Z. N. Tetana, S. S. Gqoba, P. K. Mubiayi and E. C. Linganiso, *Mater. Chem. Phys.*, 2022, **287**, 126229.
- 34 P. Tiwary, R. Mahapatra and A. K. Chakraborty, *J. Mater. Sci. Mater. Electron.*, 2019, **30**, 5464-5469.
- 35 J. Qiu, X. Hu, L. Shi, J. Fan, X. MJin, W. Zhang and J. Wang, *Sens. Actuators B Chem.*, 2021, **392**, 129221.
- 36 P. S. Kuchi, H. Roshan and M. H. Sheikhi, *J. Alloys Compd.*, 2020, **816**, 152666.
- 37 H. Roshan, P. S. Kuchi, M. H. Sheikhi and A. Mirzaei, *Mater. Sci. Semicond. Process.*, 2021, **127**, 105742.
- 38 S. Samanta, P. Roy and P. Kar, *Mater. Sci. Eng. B.*, 2020, **256**, 114541.
- 39 C. K. Chung and C. A. Ku, *Micromachines*, 2023, **14**, 1330.
- 40 H. Abdollahi, M. Samkan and M. Bayat, *Mater. Res. Express.*, 2019, **6**, 075053.
- 41 C. E. Shuck, M. Han, K. Maleski, K. Hantanasirisakul, S. J. Kim, J. Choi, W. E. Reil and Y. Gogotsi, *ACS Appl. Nano Mater.*, 2019, **2**, 3368-3376.
- 42 H. Lim, H. Kwon, H. Kang, J. E. Jang and J.E. Kwon, *Nano-Micro Lett.*, 2024, **16**, 113.
- 43 S. T. Hezarjaribi and S. Nasirian, *J Inorg Organomet Polym Mater.*, 2020, **30**, 4072-4081.
- 44 H. J. Koh, S. J. Kim, K. Maleski, S. Y. Cho, Y. J. Kim, C. W. Ahn, Y. Gogotsi and H. T. Jung, *ACS Sens.*, 2019, **4**, 1365-1372.
- 45 D. Garcia-Osorio, P. Hidalgo-Falla, H. E. M. Peres, J. M. Goncalves, K. Araki, S. Garcia-Segura and G. Picasso, *Sensors*, 2021, **21**, 440.
- 46 C. Cobianu, B. C. Serban, N. Dumbravescu, O. Buiu, V. Avramescu, C. Pachiu, B. Bitu and M. Bumbac, *Nanomaterials*, 2020, **10**, 2552.
- 47 L. Wu, X. Shi, H. Du, Q. An, Z. Li, H. Xu and H. Ran, *AIP Adv.*, 2021, **11**, 055305
